# Supplementary material for: Low temperature insights into the crystal and magnetic structure of a neutral radical ferromagnet
Source: Royal Society of Chemistry journal article supplement (doi:10.1039/d1cc03842g), 2021-01-01
Supplement: d1cc03842g1.pdf [file d1cc03842g1.pdf]

## *Electronic Supporting Information*

### **Low Temperature Insights into the Crystal and Magnetic Structure of a Neutral Radical Ferromagnet**

*Craig M. Robertson,* <sup>a\*</sup> *Stephen M. Winter,* <sup>b</sup> *Michael R. Probert,* <sup>c</sup> *Judith A. K. Howard* <sup>d</sup>  
*and Richard T. Oakley* <sup>e\*</sup>

<sup>a</sup> Department of Chemistry, University of Liverpool, Liverpool, L69 7ZD, United Kingdom;

<sup>b</sup> Department of Physics, Wake Forest University, Winston-Salem, NC 27109, USA;

<sup>c</sup> Chemistry, School of Natural and Environmental Sciences, Newcastle University,  
Newcastle upon Tyne, NE1 7RU, United Kingdom;

<sup>d</sup> Department of Chemistry, Durham University, Durham, DH1 3LE, United Kingdom;

<sup>e</sup> Department of Chemistry, University of Waterloo, Waterloo, Ontario N2L 3G1, Canada

**Author e-mail addresses:** craig.robertson@liverpool.ac.uk; oakley@uwaterloo.ca

#### **Contents (9 pages total)**

|                                                                                                 |         |
|-------------------------------------------------------------------------------------------------|---------|
| <b>Crystallographic Measurements</b>                                                            | Page S2 |
| <b>Table S1.</b> Crystal Data for <b>1a</b> .                                                   | Page S3 |
| <b>Theoretical Calculations</b>                                                                 | Page S4 |
| <b>Fig. S1.</b> Color coded pattern of pairwise exchange interactions $J_{1-4}$ and $J_{\pi}$ . | Page S4 |
| <b>Table S2.</b> Summary of all BS-DFT Exchange Energies for <b>1a</b> .                        | Page S5 |
| <b>Table S3.</b> BS-DFT Exchange Energies for <b>1a</b> at 296 K.                               | Page S6 |
| <b>Table S4.</b> BS-DFT Exchange Energies for <b>1a</b> at 100 K.                               | Page S7 |
| <b>Table S5.</b> BS-DFT Exchange Energies for <b>1a</b> at 2 K.                                 | Page S8 |
| <b>References</b>                                                                               | Page S9 |

## Crystallographic Measurements

Ultra-low temperature crystallographic data were collected on the custom-built XIPHOS system previously described.<sup>1</sup> Temperature control was achieved using a Lakeshore 340 controller with measurements performed by means of a Lakeshore DT-470-CO-13 diode. Crystals of **1a** suitable for X-ray work were grown by electrocrystallization, as previously described (reference 9a, main text). A well-formed single crystal of **1a** (0.250 × 0.075 × 0.070 mm) was selected and mounted onto a graphite fibre with low-temperature epoxy resin (Oxford Instruments, TRZ0004), centred optically at room temperature and then enclosed within a double-walled Be chamber. A dynamic vacuum of  $\sim 5.4 \times 10^{-6}$  mbar was maintained throughout the experiment. The sample was gradually cooled from room temperature to 2 K over an approximately 12 h period and then centred in the X-ray beam via diffraction. All data were collected at a generator setting of 50 kV and 108 mA, using 20 s  $\phi$  scans (0.5° frame width) at a detector distance of 8 cm from the sample. A total of 12 scans were collected at  $2\theta$  angles =  $\pm 20^\circ$  and  $\pm 40^\circ$ . Crystal centring, data collection and processing were performed with APEX2 software.<sup>2</sup> Data were integrated via SAINT<sup>3</sup> and reflections corrected with SADABS.<sup>4</sup> Using Olex2,<sup>5</sup> the structure was solved with the ShelXT<sup>6</sup> structure solution program using Intrinsic Phasing and refined with the XL<sup>7</sup> refinement package using Least Squares minimisation.

**Table S1** Crystal Data for **1a**.

| CCDC code                                                    | 701731 <sup>a</sup>                                            | 701735 <sup>a</sup>                                            | 2096260                                                        |
|--------------------------------------------------------------|----------------------------------------------------------------|----------------------------------------------------------------|----------------------------------------------------------------|
| Formula                                                      | C <sub>7</sub> H <sub>5</sub> ClN <sub>3</sub> Se <sub>4</sub> | C <sub>7</sub> H <sub>5</sub> ClN <sub>3</sub> Se <sub>4</sub> | C <sub>7</sub> H <sub>5</sub> ClN <sub>3</sub> Se <sub>4</sub> |
| <i>M</i>                                                     | 482.43                                                         | 482.43                                                         | 482.43                                                         |
| <i>a</i> (Å)                                                 | 16.2708(5)                                                     | 16.1801(12)                                                    | 16.1915(4)                                                     |
| <i>c</i> (Å)                                                 | 4.1720(3)                                                      | 4.1264(6)                                                      | 4.07570(10)                                                    |
| <i>V</i> (Å <sup>3</sup> )                                   | 1104.49(9)                                                     | 1080.27(8)                                                     | 1068.50(6)                                                     |
| $\rho_{\text{calcd}}$ (g cm <sup>-3</sup> )                  | 2.901                                                          | 2.966                                                          | 2.999                                                          |
| space group                                                  | <i>P</i> $\bar{4}$ <sub>2</sub> <i>m</i>                       | <i>P</i> $\bar{4}$ <sub>2</sub> <i>m</i>                       | <i>P</i> $\bar{4}$ <sub>2</sub> <i>m</i>                       |
| <i>Z</i>                                                     | 4                                                              | 4                                                              | 4                                                              |
| temp (K)                                                     | 296(2)                                                         | 100(2)                                                         | 2(1)                                                           |
| $\mu$ (mm <sup>-1</sup> )                                    | 13.494                                                         | 13.80                                                          | 13.949                                                         |
| $\lambda$ (Å)                                                | 0.71073                                                        | 0.71073                                                        | 0.71073                                                        |
| solution method                                              | direct methods                                                 | direct methods                                                 | direct methods                                                 |
| data/restr/params                                            | 1209/0/76                                                      | 1175/0/77                                                      | 1663/0/83                                                      |
| <i>R</i> , <i>R</i> <sub>w</sub> (on <i>F</i> <sup>2</sup> ) | 0.0374, 0.0635                                                 | 0.0376, 0.0813                                                 | 0.0252, 0.0408                                                 |

<sup>a</sup> See reference 9a, main text.

## Theoretical Calculations

Unrestricted BS-DFT<sup>8</sup> calculations on the exchange energies in **1a** ( $J_\pi, J_{1-4}$ ) were performed using the range of functionals listed in the text and the split-valence triple- $\xi$  quality 6-311G(d,p) basis set, as contained in the Gaussian 16W suite of programs.<sup>9</sup> Tight convergence criteria were employed, and atomic coordinates were taken from crystallographic data collected at 296 K, 100 K and 2 K. The magnitude and sign of exchange energies were based on the isotropic Heisenberg Hamiltonian  $H_{ex} = -2J_{ij} \{S_i \cdot S_j\}$  for interacting pairs ( $i, j$ ) of radicals and were computed (from eq. 2, main text) using single-point energies of the triplet  $E_{TS}$  and broken symmetry singlet  $E_{BSS}$  states and their respective  $\langle S^2 \rangle$  expectation values. A full listing of all ( $J_\pi, J_{1-4}$ ) values is provided in Table S2, with details of individual calculations given in Tables S3-S5. The model 1D calculations (Fig. 2a, main text) of  $J_\pi$  as a function of the  $\pi$ -stack slippage were performed using coordinates of a model **1** ( $R_1 = R_2 = H$ ) obtained from a UB3LYP/6-31G(d,p) optimization in  $C_{2v}$  symmetry.

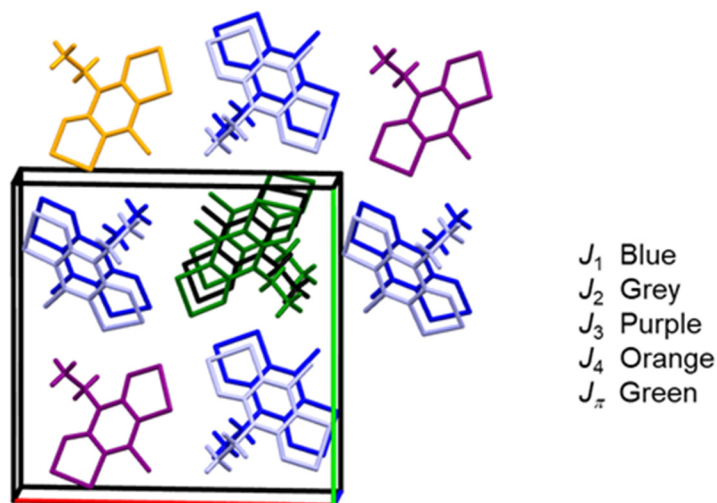

**Fig. S1.** Color coded pattern of pairwise exchange interactions  $J_{1-4}$  and  $J_\pi$ , all referenced to a single radical (black). The total number of pairwise interactions  $zJ = 4J_1 + 4J_2 + 2J_3 + J_4 + 2J_\pi$ .

**Table S2.** Summary of all BS-DFT Exchange Energies for **1a**.

| Functional        | $T$ (K) | $J_1$ (cm <sup>-1</sup> ) | $J_2$ (cm <sup>-1</sup> ) | $J_3$ (cm <sup>-1</sup> ) | $J_4$ (cm <sup>-1</sup> ) | $J_\pi$ (cm <sup>-1</sup> ) | $\Theta$ (K) <sup>a</sup> |
|-------------------|---------|---------------------------|---------------------------|---------------------------|---------------------------|-----------------------------|---------------------------|
| B3LYP             | 296     | 4.92                      | 0.13                      | -0.64                     | -0.18                     | -6.97                       | 3.5                       |
|                   | 100     | 5.64                      | 0.15                      | -0.57                     | -0.22                     | -7.75                       | 4.5                       |
|                   | 2       | 5.55                      | -0.29                     | -0.81                     | -0.20                     | -1.57                       | 11.6                      |
| PBE0              | 296     | 5.14                      | 0.83                      | -0.46                     | -0.11                     | -4.11                       | 10.5                      |
|                   | 100     | 5.86                      | 0.94                      | -0.37                     | -0.15                     | -4.59                       | 12.3                      |
|                   | 2       | 5.77                      | 0.55                      | -0.57                     | -0.13                     | 1.16                        | 18.9                      |
| CAM-B3LYP         | 296     | 2.90                      | 1.32                      | -0.33                     | -0.20                     | 1.23                        | 13.3                      |
|                   | 100     | 3.36                      | 1.45                      | -0.31                     | -0.22                     | 1.40                        | 15.2                      |
|                   | 2       | 3.34                      | 1.29                      | -0.46                     | -0.22                     | 5.54                        | 20.5                      |
| $\omega$ B97XD    | 296     | 3.16                      | 1.56                      | -0.31                     | -0.15                     | 2.27                        | 16.3                      |
|                   | 100     | 3.56                      | 2.04                      | -0.31                     | -0.18                     | 3.35                        | 20.4                      |
|                   | 2       | 3.51                      | 2.06                      | -0.44                     | -0.18                     | 5.87                        | 23.7                      |
| LC- $\omega$ HPBE | 296     | 2.15                      | 1.29                      | -0.24                     | -0.18                     | 4.49                        | 15.9                      |
|                   | 100     | 2.50                      | 1.47                      | -0.20                     | -0.22                     | 5.13                        | 18.4                      |
|                   | 2       | 2.48                      | 1.36                      | -0.29                     | -0.20                     | 8.77                        | 23.1                      |

<sup>a</sup> Estimated from mean field approximation as  $\Theta = 0.5 zJ/k_B$ , where  $zJ = 4J_1 + 4J_2 + 2J_3 + J_4 + 2J_\pi$  (derived from the connectivity pattern shown in Fig. S1).

**Table S2.** BS-DFT Exchange Energies for **1a** at 296 K.**UB3LYP/6-311G(d,p)**

| Dimer                | Triplet (H)     | $\langle S^2 \rangle_{TS}$ | BS Singlet (H)  | $\langle S^2 \rangle_{BSS}$ | $J$ (cm <sup>-1</sup> ) | $J$ (K) |
|----------------------|-----------------|----------------------------|-----------------|-----------------------------|-------------------------|---------|
| $J_1$ ( $d_1$ )      | -21000.87832080 | 2.0517                     | -21000.87829840 | 1.0516                      | 4.916                   | 7.073   |
| $J_2$ ( $d_2$ )      | -21000.87824180 | 2.0520                     | -21000.87824120 | 1.0510                      | 0.132                   | 0.189   |
| $J_3$ ( $d_3$ )      | -21000.87817700 | 2.0526                     | -21000.87817990 | 1.0524                      | -0.636                  | -0.916  |
| $J_4$ ( $d_4$ )      | -21000.87786390 | 2.0529                     | -21000.87786470 | 1.0529                      | -0.176                  | -0.253  |
| $J_\pi$ ( $\delta$ ) | -21000.87247790 | 2.0522                     | -21000.87250980 | 1.0479                      | -6.971                  | -10.030 |

$$\Theta(\text{calc}) = 0.5 * zJ(\text{calc}) = 3.5 \text{ K}$$

**UPBE1PBE/6-311G(d,p)**

| Dimer                | Triplet (H)     | $\langle S^2 \rangle_{TS}$ | BS Singlet (H)  | $\langle S^2 \rangle_{BSS}$ | $J$ (cm <sup>-1</sup> ) | $J$ (K) |
|----------------------|-----------------|----------------------------|-----------------|-----------------------------|-------------------------|---------|
| $J_1$ ( $d_1$ )      | -20997.03393340 | 2.0732                     | -20997.03391000 | 1.0731                      | 5.135                   | 7.389   |
| $J_2$ ( $d_2$ )      | -20997.03440010 | 2.0734                     | -20997.03439630 | 1.0728                      | 0.834                   | 1.199   |
| $J_3$ ( $d_3$ )      | -20997.03171050 | 2.0744                     | -20997.03171260 | 1.0742                      | -0.461                  | -0.663  |
| $J_4$ ( $d_4$ )      | -20997.03120790 | 2.0747                     | -20997.03120840 | 1.0747                      | -0.110                  | -0.158  |
| $J_\pi$ ( $\delta$ ) | -20997.03434940 | 2.0740                     | -20997.03436820 | 1.0705                      | -4.112                  | -5.916  |

$$\Theta(\text{calc}) = 0.5 * zJ(\text{calc}) = 10.5 \text{ K}$$

**UCAM-B3LYP/6-311G(d,p)**

| Dimer                | Triplet (H)     | $\langle S^2 \rangle_{TS}$ | BS Singlet (H)  | $\langle S^2 \rangle_{BSS}$ | $J$ (cm <sup>-1</sup> ) | $J$ (K) |
|----------------------|-----------------|----------------------------|-----------------|-----------------------------|-------------------------|---------|
| $J_1$ ( $d_1$ )      | -21001.14138450 | 2.1405                     | -21001.14137130 | 1.1404                      | 2.897                   | 4.168   |
| $J_2$ ( $d_2$ )      | -21001.14210210 | 2.1401                     | -21001.14209610 | 1.1399                      | 1.317                   | 1.894   |
| $J_3$ ( $d_3$ )      | -21001.14053320 | 2.1419                     | -21001.14053470 | 1.1418                      | -0.329                  | -0.474  |
| $J_4$ ( $d_4$ )      | -21001.14016010 | 2.1425                     | -21001.14016100 | 1.1425                      | -0.198                  | -0.284  |
| $J_\pi$ ( $\delta$ ) | -21001.14153680 | 2.1414                     | -21001.14153120 | 1.1398                      | 1.227                   | 1.766   |

$$\Theta(\text{calc}) = 0.5 * zJ(\text{calc}) = 13.3 \text{ K}$$

**U $\omega$ B97XD/6-311G(d,p)**

| Dimer                | Triplet (H)     | $\langle S^2 \rangle_{TS}$ | BS Singlet (H)  | $\langle S^2 \rangle_{BSS}$ | $J$ (cm <sup>-1</sup> ) | $J$ (K) |
|----------------------|-----------------|----------------------------|-----------------|-----------------------------|-------------------------|---------|
| $J_1$ ( $d_1$ )      | -21000.74575930 | 2.1732                     | -21000.74574440 | 1.1371                      | 3.156                   | 4.541   |
| $J_2$ ( $d_2$ )      | -21000.74659090 | 2.1367                     | -21000.74658380 | 1.1364                      | 1.558                   | 2.241   |
| $J_3$ ( $d_3$ )      | -21000.74053660 | 2.1384                     | -21000.74053800 | 1.1384                      | -0.307                  | -0.442  |
| $J_4$ ( $d_4$ )      | -21000.73999030 | 2.1391                     | -21000.73999100 | 1.1391                      | -0.154                  | -0.221  |
| $J_\pi$ ( $\delta$ ) | -21000.76727650 | 2.1340                     | -21000.76726620 | 1.1367                      | 2.267                   | 3.261   |

$$\Theta(\text{calc}) = 0.5 * zJ(\text{calc}) = 16.3 \text{ K}$$

**ULC- $\omega$ HPBE/6-311G(d,p)**

| Dimer                | Triplet (H)     | $\langle S^2 \rangle_{TS}$ | BS Singlet (H)  | $\langle S^2 \rangle_{BSS}$ | $J$ (cm <sup>-1</sup> ) | $J$ (K) |
|----------------------|-----------------|----------------------------|-----------------|-----------------------------|-------------------------|---------|
| $J_1$ ( $d_1$ )      | -20997.01700740 | 2.2409                     | -20997.01699760 | 1.2408                      | 2.151                   | 3.094   |
| $J_2$ ( $d_2$ )      | -20997.01802740 | 2.2400                     | -20997.01802150 | 1.2398                      | 1.295                   | 1.863   |
| $J_3$ ( $d_3$ )      | -20997.01631850 | 2.2424                     | -20997.01631960 | 1.2424                      | -0.241                  | -0.347  |
| $J_4$ ( $d_4$ )      | -20997.01619280 | 2.2432                     | -20997.01619360 | 1.2443                      | -0.176                  | -0.253  |
| $J_\pi$ ( $\delta$ ) | -20997.02064050 | 2.2424                     | -20997.02062000 | 1.2413                      | 4.494                   | 6.466   |

$$\Theta(\text{calc}) = 0.5 * zJ(\text{calc}) = 15.9 \text{ K}$$

**Table S3.** BS-DFT Exchange Energies for **1a** at 100 K.**UB3LYP/6-311G(d,p)**

| Dimer                | Triplet (H)     | $\langle S^2 \rangle_{\text{TS}}$ | BS Singlet (H)  | $\langle S^2 \rangle_{\text{BSS}}$ | $J$ (cm <sup>-1</sup> ) | $J$ (K) |
|----------------------|-----------------|-----------------------------------|-----------------|------------------------------------|-------------------------|---------|
| $J_1$ ( $d_1$ )      | -21000.88965690 | 2.0499                            | -21000.88963120 | 1.0498                             | 5.640                   | 8.115   |
| $J_2$ ( $d_2$ )      | -21000.88941510 | 2.0502                            | -21000.88941440 | 1.0492                             | 0.153                   | 0.221   |
| $J_3$ ( $d_3$ )      | -21000.88989670 | 2.0508                            | -21000.88989930 | 1.0506                             | -0.571                  | -0.821  |
| $J_4$ ( $d_4$ )      | -21000.88961430 | 2.0511                            | -21000.88961530 | 1.0511                             | -0.219                  | -0.316  |
| $J_\pi$ ( $\delta$ ) | -21000.88311080 | 2.0504                            | -21000.88314630 | 1.0455                             | -7.753                  | -11.156 |

$$\mathcal{O}(\text{calc}) = 0.5 * zJ (\text{calc}) = 4.5 \text{ K}$$

**UPBE1PBE/6-311G(d,p)**

| Dimer                | Triplet (H)     | $\langle S^2 \rangle_{\text{TS}}$ | BS Singlet (H)  | $\langle S^2 \rangle_{\text{BSS}}$ | $J$ (cm <sup>-1</sup> ) | $J$ (K) |
|----------------------|-----------------|-----------------------------------|-----------------|------------------------------------|-------------------------|---------|
| $J_1$ ( $d_1$ )      | -20997.04509520 | 2.0706                            | -20997.04506850 | 1.0705                             | 5.859                   | 8.430   |
| $J_2$ ( $d_2$ )      | -20997.04536720 | 2.0709                            | -20997.04536290 | 1.0702                             | 0.943                   | 1.357   |
| $J_3$ ( $d_3$ )      | -20997.04304430 | 2.0718                            | -20997.04304600 | 1.0717                             | -0.373                  | -0.537  |
| $J_4$ ( $d_4$ )      | -20997.04254760 | 2.0722                            | -20997.04254830 | 1.0722                             | -0.154                  | -0.221  |
| $J_\pi$ ( $\delta$ ) | -20997.04527680 | 2.0714                            | -20997.04529780 | 1.0674                             | -4.591                  | -6.605  |

$$\mathcal{O}(\text{calc}) = 0.5 * zJ (\text{calc}) = 12.3 \text{ K}$$

**UCAM-B3LYP/6-311G(d,p)**

| Dimer                | Triplet (H)     | $\langle S^2 \rangle_{\text{TS}}$ | BS Singlet (H)  | $\langle S^2 \rangle_{\text{BSS}}$ | $J$ (cm <sup>-1</sup> ) | $J$ (K) |
|----------------------|-----------------|-----------------------------------|-----------------|------------------------------------|-------------------------|---------|
| $J_1$ ( $d_1$ )      | -21001.15237690 | 2.1349                            | -21001.15236160 | 1.1348                             | 3.358                   | 4.831   |
| $J_2$ ( $d_2$ )      | -21001.15294230 | 2.1347                            | -21001.15293570 | 1.1344                             | 1.448                   | 2.084   |
| $J_3$ ( $d_3$ )      | -21001.15185420 | 2.1363                            | -21001.15185560 | 1.1363                             | -0.307                  | -0.442  |
| $J_4$ ( $d_4$ )      | -21001.15152740 | 2.1370                            | -21001.15152840 | 1.1370                             | -0.219                  | -0.316  |
| $J_\pi$ ( $\delta$ ) | -21001.15225050 | 2.1358                            | -21001.15224410 | 1.1340                             | 1.402                   | 2.017   |

$$\mathcal{O}(\text{calc}) = 0.5 * zJ (\text{calc}) = 15.2 \text{ K}$$

**U $\omega$ B97XD/6-311G(d,p)**

| Dimer                | Triplet (H)     | $\langle S^2 \rangle_{\text{TS}}$ | BS Singlet (H)  | $\langle S^2 \rangle_{\text{BSS}}$ | $J$ (cm <sup>-1</sup> ) | $J$ (K) |
|----------------------|-----------------|-----------------------------------|-----------------|------------------------------------|-------------------------|---------|
| $J_1$ ( $d_1$ )      | -21000.75720430 | 2.1319                            | -21000.75718810 | 1.1318                             | 3.555                   | 5.115   |
| $J_2$ ( $d_2$ )      | -21000.75777690 | 2.1315                            | -21000.75776760 | 1.1312                             | 2.041                   | 2.936   |
| $J_3$ ( $d_3$ )      | -21000.75216240 | 2.1331                            | -21000.75216380 | 1.1331                             | -0.307                  | -0.442  |
| $J_4$ ( $d_4$ )      | -21000.75163540 | 2.1338                            | -21000.75163620 | 1.1339                             | -0.176                  | -0.253  |
| $J_\pi$ ( $\delta$ ) | -21000.77932000 | 2.1328                            | -21000.77930470 | 1.1310                             | 3.352                   | 4.823   |

$$\mathcal{O}(\text{calc}) = 0.5 * zJ (\text{calc}) = 20.4 \text{ K}$$

**ULC- $\omega$ HPBE/6-311G(d,p)**

| Dimer                | Triplet (H)     | $\langle S^2 \rangle_{\text{TS}}$ | BS Singlet (H)  | $\langle S^2 \rangle_{\text{BSS}}$ | $J$ (cm <sup>-1</sup> ) | $J$ (K) |
|----------------------|-----------------|-----------------------------------|-----------------|------------------------------------|-------------------------|---------|
| $J_1$ ( $d_1$ )      | -20997.02815530 | 2.2312                            | -20997.02814390 | 1.2311                             | 2.502                   | 3.600   |
| $J_2$ ( $d_2$ )      | -20997.02903730 | 2.2304                            | -20997.02903060 | 1.2302                             | 1.470                   | 2.115   |
| $J_3$ ( $d_3$ )      | -20997.02770920 | 2.2327                            | -20997.02771010 | 1.2327                             | -0.198                  | -0.284  |
| $J_4$ ( $d_4$ )      | -20997.02761370 | 2.2336                            | -20997.02761470 | 1.2336                             | -0.219                  | -0.316  |
| $J_\pi$ ( $\delta$ ) | -20997.03186820 | 2.2325                            | -20997.03184480 | 1.2313                             | 5.130                   | 7.380   |

$$\mathcal{O}(\text{calc}) = 0.5 * zJ (\text{calc}) = 18.4 \text{ K}$$

**Table S4.** BS-DFT Exchange Energies for **1a** at 2 K.**UB3LYP/6-311G(d,p)**

| Dimer           | Triplet (H)     | $\langle S^2 \rangle_{\text{TS}}$ | BS Singlet (H)  | $\langle S^2 \rangle_{\text{BSS}}$ | $J$ (cm <sup>-1</sup> ) | $J$ (K) |
|-----------------|-----------------|-----------------------------------|-----------------|------------------------------------|-------------------------|---------|
| $J_1$ ( $d_1$ ) | -21000.90607280 | 2.0497                            | -21000.90604750 | 1.0496                             | 5.552                   | 7.988   |
| $J_2$ ( $d_2$ ) | -21000.90597940 | 2.0500                            | -21000.90598070 | 1.0489                             | -0.285                  | -0.410  |
| $J_3$ ( $d_3$ ) | -21000.90642880 | 2.0507                            | -21000.90643250 | 1.0504                             | -0.812                  | -1.168  |
| $J_4$ ( $d_4$ ) | -21000.90613490 | 2.0509                            | -21000.90613580 | 1.0509                             | -0.198                  | -0.284  |
| $J_p$ ( $d$ )   | -21000.89838850 | 2.0502                            | -21000.89839570 | 1.0466                             | -1.575                  | -2.265  |

$$\Theta(\text{calc}) = 0.5 * zJ(\text{calc}) = 11.6 \text{ K}$$

**UPBE1PBE/6-311G(d,p)**

| Dimer           | Triplet (H)     | $\langle S^2 \rangle_{\text{TS}}$ | BS Singlet (H)  | $\langle S^2 \rangle_{\text{BSS}}$ | $J$ (cm <sup>-1</sup> ) | $J$ (K) |
|-----------------|-----------------|-----------------------------------|-----------------|------------------------------------|-------------------------|---------|
| $J_1$ ( $d_1$ ) | -20997.06131230 | 2.0702                            | -20997.06128600 | 1.0701                             | 5.772                   | 8.304   |
| $J_2$ ( $d_2$ ) | -20997.06172010 | 2.0705                            | -20997.06171760 | 1.0698                             | 0.548                   | 0.789   |
| $J_3$ ( $d_3$ ) | -20997.05930900 | 2.0715                            | -20997.05931160 | 1.0713                             | -0.571                  | -0.821  |
| $J_4$ ( $d_4$ ) | -20997.05880750 | 2.0718                            | -20997.05880810 | 1.0718                             | -0.132                  | -0.189  |
| $J_p$ ( $d$ )   | -20997.06084650 | 2.0710                            | -20997.06084120 | 1.0680                             | 1.160                   | 1.669   |

$$\Theta(\text{calc}) = 0.5 * zJ(\text{calc}) = 18.9 \text{ K}$$

**UCAM-B3LYP/6-311G(d,p)**

| Dimer           | Triplet (H)     | $\langle S^2 \rangle_{\text{TS}}$ | BS Singlet (H)  | $\langle S^2 \rangle_{\text{BSS}}$ | $J$ (cm <sup>-1</sup> ) | $J$ (K) |
|-----------------|-----------------|-----------------------------------|-----------------|------------------------------------|-------------------------|---------|
| $J_1$ ( $d_1$ ) | -21001.16791440 | 2.1344                            | -21001.16789920 | 1.1343                             | 3.336                   | 4.799   |
| $J_2$ ( $d_2$ ) | -21001.16863150 | 2.1342                            | -21001.16862560 | 1.1339                             | 1.295                   | 1.863   |
| $J_3$ ( $d_3$ ) | -21001.16750050 | 2.1359                            | -21001.16750260 | 1.1359                             | -0.461                  | -0.663  |
| $J_4$ ( $d_4$ ) | -21001.16717730 | 2.1366                            | -21001.16717830 | 1.1366                             | -0.219                  | -0.316  |
| $J_p$ ( $d$ )   | -21001.16705470 | 2.1353                            | -21001.16702940 | 1.1338                             | 5.544                   | 7.977   |

$$\Theta(\text{calc}) = 0.5 * zJ(\text{calc}) = 20.5 \text{ K}$$

**U $\omega$ B97XD/6-311G(d,p)**

| Dimer           | Triplet (H)     | $\langle S^2 \rangle_{\text{TS}}$ | BS Singlet (H)  | $\langle S^2 \rangle_{\text{BSS}}$ | $J$ (cm <sup>-1</sup> ) | $J$ (K) |
|-----------------|-----------------|-----------------------------------|-----------------|------------------------------------|-------------------------|---------|
| $J_1$ ( $d_1$ ) | -21000.77274120 | 2.1313                            | -21000.77272520 | 1.1312                             | 3.511                   | 5.052   |
| $J_2$ ( $d_2$ ) | -21000.77345840 | 2.1308                            | -21000.77344900 | 1.1305                             | 2.062                   | 2.967   |
| $J_3$ ( $d_3$ ) | -21000.76780510 | 2.1326                            | -21000.76780710 | 1.1326                             | -0.439                  | -0.632  |
| $J_4$ ( $d_4$ ) | -21000.76728410 | 2.1334                            | -21000.76728490 | 1.1334                             | -0.176                  | -0.253  |
| $J_p$ ( $d$ )   | -21000.79491280 | 2.1323                            | -21000.79488600 | 1.1308                             | 5.873                   | 8.450   |

$$\Theta(\text{calc}) = 0.5 * zJ(\text{calc}) = 23.7 \text{ K}$$

**ULC- $\omega$ HPBE/6-311G(d,p)**

| Dimer           | Triplet (H)     | $\langle S^2 \rangle_{\text{TS}}$ | BS Singlet (H)  | $\langle S^2 \rangle_{\text{BSS}}$ | $J$ (cm <sup>-1</sup> ) | $J$ (K) |
|-----------------|-----------------|-----------------------------------|-----------------|------------------------------------|-------------------------|---------|
| $J_1$ ( $d_1$ ) | -20997.04280840 | 2.2299                            | -20997.04279710 | 1.2298                             | 2.480                   | 3.568   |
| $J_2$ ( $d_2$ ) | -20997.04384530 | 2.2290                            | -20997.04383910 | 1.2288                             | 1.360                   | 1.957   |
| $J_3$ ( $d_3$ ) | -20997.04247370 | 2.2315                            | -20997.04247500 | 1.2315                             | -0.285                  | -0.411  |
| $J_4$ ( $d_4$ ) | -20997.04235780 | 2.2324                            | -20997.04235870 | 1.2325                             | -0.198                  | -0.284  |
| $J_p$ ( $d$ )   | -20997.04609440 | 2.2313                            | -20997.04605440 | 1.2301                             | 8.768                   | 12.616  |

$$\Theta(\text{calc}) = 0.5 * zJ(\text{calc}) = 23.1 \text{ K}$$



## References

- 
- <sup>1</sup> M. R. Probert, C. M. Robertson, J. A. Coome, J. A. K. Howard, B. C. Michell and A. E. Goeta, *J. Appl. Cryst.*, 2010, **43**, 1415.
- <sup>2</sup> *APEX2*, Version 2010.1-2. Bruker AXS Inc., Madison, WI, USA.
- <sup>3</sup> *SAINT*, Version 7.68a. Bruker AXS Inc., Madison, WI, USA.
- <sup>4</sup> *SADABS*, 2003, Version 2.10. G. M. Sheldrick, University of Gottingen, Germany.
- <sup>5</sup> *OLEX2*, O V. Dolomanov, L. J. Bourhis, R. J. Gildea, J. A. K. Howard and H. Puschmann, *J. Appl. Cryst.*, 2009, **42**, 339.
- <sup>6</sup> G. M. Sheldrick, *Acta Cryst. A*, 2018, **71**, 3.
- <sup>7</sup> G. M. Sheldrick, *Acta Cryst. A*, 2008, **64**, 112.
- <sup>8</sup> (a) L. Noodleman, *J. Chem. Phys.*, 1981, **74**, 5737; (b) L. Noodleman and E. R. Davidson, *Chem. Phys.*, 1986, **109**, 131. (c) K. Yamaguchi, F. Jensen, A. Dorigo and K. N. Houk, *Chem. Phys. Lett.*, 1988, **149**, 537; (d) H. Nagao, M. Nishino, Y. Shigeta, T. Soda, Y. Kitagawa, T. Onishi, Y. Yoshika and K. Yamaguchi, *Coord. Chem. Rev.*, 2000, **198**, 265.
- <sup>9</sup> Gaussian 16W, Revision B.01, M. J. Frisch, G. W. Trucks, H. B. Schlegel, G. E. Scuseria, M. A. Robb, J. R. Cheeseman, G. Scalmani, V. Barone, G. A. Petersson, H. Nakatsuji, X. Li, M. Caricato, A. V. Marenich, J. Bloino, B. G. Janesko, R. Gomperts, B. Mennucci, H. P. Hratchian, J. V. Ortiz, A. F. Izmaylov, J. L. Sonnenberg, D. Williams-Young, F. Ding, F. Lipparini, F. Egidi, J. Goings, B. Peng, A. Petrone, T. Henderson, D. Ranasinghe, V. G. Zakrzewski, J. Gao, N. Rega, G. Zheng, W. Liang, M. Hada, M. Ehara, K. Toyota, R. Fukuda, J. Hasegawa, M. Ishida, T. Nakajima, Y. Honda, O. Kitao, H. Nakai, T. Vreven, K. Throssell, J. A. Montgomery, Jr., J. E. Peralta, F. Ogliaro, M. J. Bearpark, J. J. Heyd, E. N. Brothers, K. N. Kudin, V. N. Staroverov, T. A. Keith, R. Kobayashi, J. Normand, K. Raghavachari, A. P. Rendell, J. C. Burant, S. S. Iyengar, J. Tomasi, M. Cossi, J. M. Millam, M. Klene, C. Adamo, R. Cammi, J. W. Ochterski, R. L. Martin, K. Morokuma, O. Farkas, J. B. Foresman, and D. J. Fox, Gaussian, Inc., Wallingford CT, 2016.
